# Supplementary material
Source: PubMed Central journal article supplement (PMC1600002)

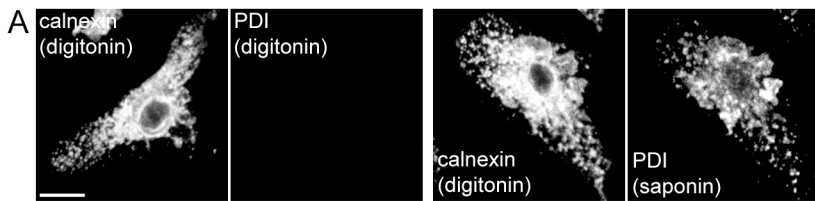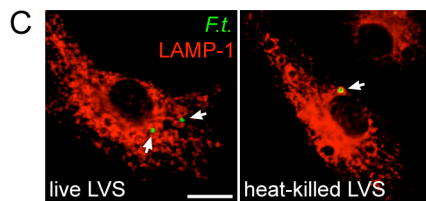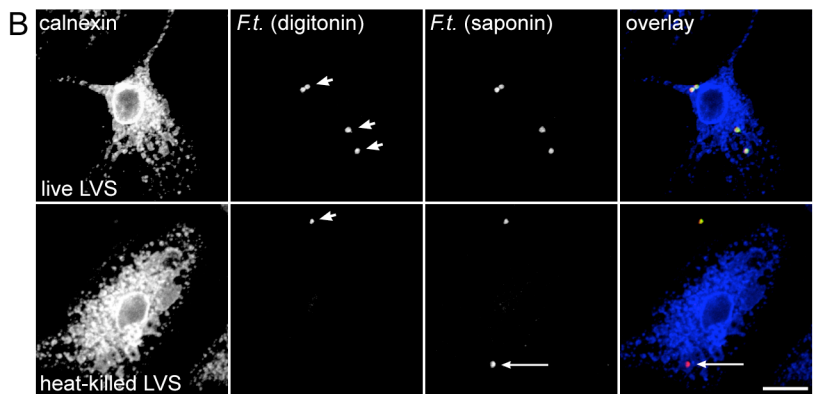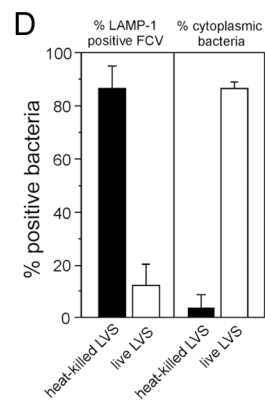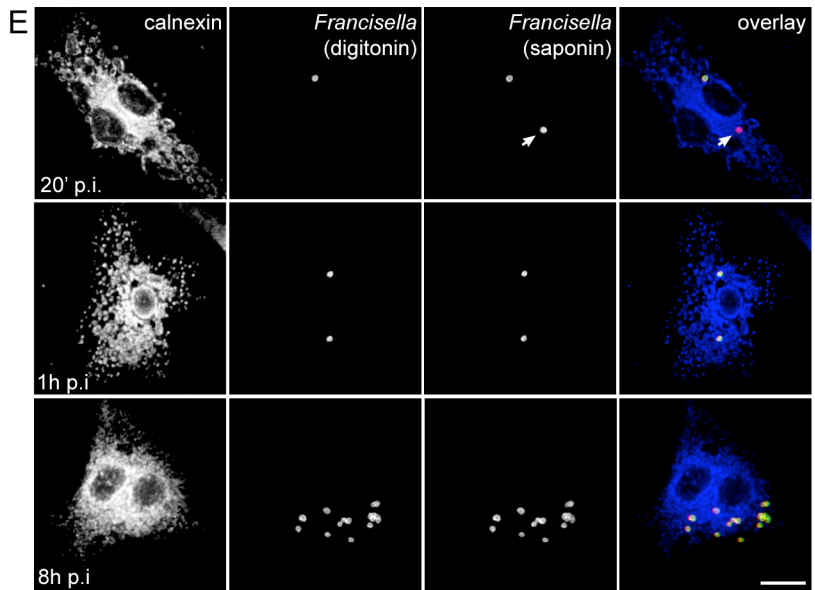

Supplement: pnas_0601838103_1.pdf [file pnas_0601838103_1.pdf]

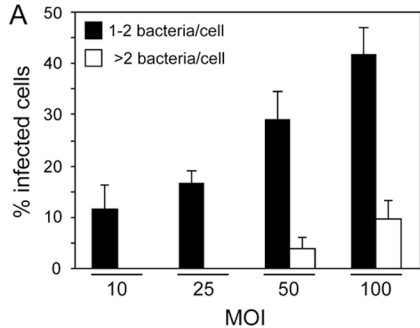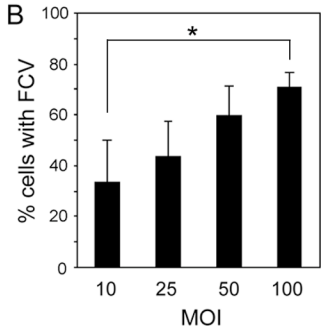

Supplement: pnas_0601838103_2.pdf [file pnas_0601838103_2.pdf]

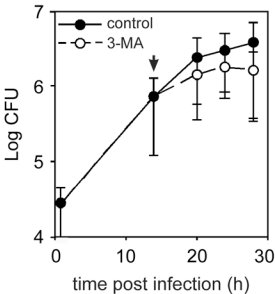

Supplement: pnas_0601838103_5.pdf [file pnas_0601838103_5.pdf]
